# Supplementary material
Source: PubMed Central journal article supplement (PMC2714257)
Supplement: NIHMS107147-supplement-2.pdf [file NIHMS107147-supplement-2.pdf]

**Allele frequency (f) determination for LOI – f/(1-f)** (Chen et al. 2002 – manuscript)

Allele frequencies were normalized against heterozygous controls. Specifically, we let  $C_1$  and  $C_2$  be the PCR Ct values [average of 3 replicate runs] with allele-specific primers 1 and 2, and  $C_1'$  and  $C_2'$  [average of 3 replicate runs] be those for a heteroduplex sample used for calibration of allele specificity. Then, the cycle difference is  $\Delta Ct = [C_1 - C_2] - [C_1' - C_2']$ , and the allele frequency is given by:

$$f = 1 / [2^{\Delta Ct} + 1]$$

The standard deviation in  $\Delta Ct$ ,  $\sigma_{\Delta Ct}$ , is calculated from the weighted root mean square of the standard deviations of the contributions from the replicate sample and heterozygote measurements.

**Calibration curve for RNA stability determination**

Total cDNA concentration from 3 placentas was determined using a Nanodrop ND-1000 (NanoDrop Technologies). We constructed a duplicate RT-PCR calibration curve for 18S rRNA with concentrations of 5, 10, 15, 20 and 30 ng, bracketing the typical cDNA concentrations used for qASPCR. The non-parametric Wilcoxon signed rank test for two related samples confirmed that the duplicate assays were not significantly different, and the Wilcoxon rank-sum test on the averaged duplicate samples confirmed that the three placental samples were not different. Final averaged values were then plotted in a regression model using the SPSS software (Release 15.0.0 for Windows™, September 6, 2006, Chicago, IL, USA). Given the experimental condition of 40 amplification cycles, an arbitrary value of 0.001 ng for starting cDNA corresponding to a Ct value of 40 cycles was introduced, leading to a regression curve of:

$$\ln(Ct) = \ln(13.048) - 0.162 * \ln(\text{ng}) \quad (R^2 = 1.000, p < 0.001).$$

The RNA stability time course data in Table 2A were derived from analysis of Ct values for 6 genes at each time point plotted in a regression model consistent with the 18S rRNA calibration curve:

$$\ln(\text{Ct}) = \ln(b_0) - b_1 * \ln(\text{ng})$$

in order to obtain a weighted Ct value average over the three samples for each gene at each time point.

Supplementary Table 1. Primer set designed for PCR amplicon synthesis

| Gene                        | Primers                           |                                      |
|-----------------------------|-----------------------------------|--------------------------------------|
|                             | Forward                           | Reverse                              |
| <b>Paternally Expressed</b> |                                   |                                      |
| <i>IGF2</i>                 | 5'-CGAAGAGTCACCACCGAGC-3'         | 5'-CTCAGGACTGGGCTCTCTGG-3'           |
| <i>PEG1/MEST</i>            | 5'-TGACCACATTAGCCACTATCCA-3'      | 5'-CCTGCTGGCTTCTTCCTATAACA-3'        |
| <i>PEG3/PW1</i>             | 5'-ACATTTCTGGTGTGGAGGAGTT-3'      | 5'-AGACCAGGTTCCGGTAATTCT-3'          |
| <i>PEG10</i>                | 5'-AAATTGCCTGACATGAAGAGGAGTCTA-3' | 5'-AAGCCTAGTCACCACTTCAAAAACACTAAA-3' |
| <i>ZAC/PLAGL1</i>           | 5'-CATATTTGCATGTTAGAAGAATCAGC-3'  | 5'-TGAGTCAGTTAGGTCAGTGTAGAGAGA-3'    |
| <i>DLK1</i>                 | 5'-AGCTGCACCCCAACC-3'             | 5'-CTGCTGGCGCAGTTGGTC-3'             |
| <b>Maternally Expressed</b> |                                   |                                      |
| <i>GTL2/MEG3</i>            | 5'-GTTTCTGGACTGTGGGCTGT-3'        | 5'-CAACAGCAACAAAACACTCAGAACATTCA-3'  |
| <i>H19</i>                  | 5'-ATTTGCACTAAGTCATTTGCACTG-3'    | 5'-CAGTCACCCGGCCAGAT-3'              |
| <i>TP73</i>                 | 5'-AGGCAGGTGGGCCAATG-3'           | 5'-TGGGAGATGTTAGTAGGGGAAGC-3'        |
| <b>Not-Imprinted</b>        |                                   |                                      |
| <i>GNAS1</i>                | 5'-GCCATGAGCAACCTGGTG-3'          | 5'-GAAGTCAAAGTCAGGCACGTT-3'          |
| <i>ATP10A</i>               | 5'-GCAAAGACAGTGTGTCCAGTTACC-3'    | 5'-GCTTTGGTATGTGCCATGCAG-3'          |
| <i>OSBPL5</i>               | 5'-CTGGGCACCTGCAAGC-3'            | 5'-GGGAACAGGTCTTGGTCTGG-3'           |
| <i>KCNQ1</i>                | 5'-CGCAGAGAAGTGACGGTTC-3'         | 5'-CTCATTAAAACACAGATCCAAATCACCAC-3'  |
| <i>PPP1R9</i>               | 5'-TGTTGACCTTGCTACTGCTGTGT-3'     | 5'-AGGAGAGGAAACCTGAAAATGGTG-3'       |
| <b>Other Genes</b>          |                                   |                                      |
| <i>TXK</i>                  | 5'-GGCCGCCCTACATTTGC-3'           | 5'-TGGGTTGGCATTCTGTTTCC-3'           |
| <b>Reference Genes</b>      |                                   |                                      |
| <i>ACTB</i>                 | 5'-ACTGGAACGGTGAAGGTGAC-3'        | 5'-GTGGACTTGGGAGAGGACTG-3'           |
| <i>18S rRNA</i>             | 5'-TCAACACGGGAAACCTCACC-3'        | 5'-CAGACAAATCGCTCCACCAA-3'           |

Supplementary Table 2. Primer set designed for qASPCR

| Gene                        | Primers <sup>(a)</sup>               |                                         |
|-----------------------------|--------------------------------------|-----------------------------------------|
|                             | Forward                              | Reverse                                 |
| <b>Paternally Expressed</b> |                                      |                                         |
| <i>IGF2</i>                 | 5'-CGAAGAGTCACCACCGAGC(C/T)-3'       | 5'-CTCAGGACTGGGCTCTCTGG-3'              |
| <i>PEG1/MEST</i>            | 5'-TGTATTACCTCCCCTACTCCCTTAT(G/C)-3' | 5'-CCTGCTGGCTTCTTCCTATAACA-3'           |
| <i>PEG3/PW1</i>             | 5'-TTCAGCCCAGAGGAACTTAG(T/C)-3'      | 5'-AGACCAGGTTCCGGTAATTCT-3'             |
| <i>PEG10</i>                | 5'-AAATTGCCTGACATGAAGAGGAGTCTA-3'    | 5'-TTTAAACATGCAAGAATAAGAGC(A/G)-3'      |
| <i>ZAC/PLAGL1</i>           | 5'-TGCATGTTAGAAGAATCAGCCT-3'         | 5'-GTTCCCCAGTCTGTTTTTGGGA(C/T)-3'       |
| <i>DLK1</i>                 | 5'-GGCGTCTGCACTGACAT(T/C)-3'         | 5'-CTGCTGGCGCAGTTGGTC-3'                |
| <b>Maternally Expressed</b> |                                      |                                         |
| <i>GTL2/MEG3</i>            | 5'-TGTGTACCTTGGTTGGTGA CTGAGAA-3'    | 5'-CAACAGCAACAAA ACTCAGAACATTCA(C/T)-3' |
| <i>H19</i>                  | 5'-ATTTGCACTAAGTCATTTGCACTG-3'       | 5'-CACTCACGCACACTCG(T/C)-3'             |
| <i>TP73</i>                 | 5'-AGGCAGGTGGGCCAATG-3'              | 5'-ACCACACATACCCTAGGCAG(G/A)-3'         |
| <b>Not-Imprinted Genes</b>  |                                      |                                         |
| <i>GNAS1</i>                | 5'-GCCATGAGCAACCTGGTG-3'             | 5'-GCACGTT CATCACACTCAG(G/A)-3'         |
| <i>ATP10A</i>               | 5'-AAGACAGTGTGTCCAGTTACC-3'          | 5'-TTACGGAAGTGCCCT(G/C)-3'              |
| <i>OSBPL5</i>               | 5'-CTGGGCACCTGCAAGC-3'               | 5'-GTCTTGGTCTGGGTGGAC(G/A)-3'           |
| <i>KCNQ1</i>                | 5'-GGGTTCTTCTGGGCATTACA-3'           | 5'-CTCATTA AAAACACAGATCCAAATCACCAC-3'   |
| <i>PPP1R9</i>               | 5'-CAACACAGTTCCTCTTCCCCC(T/C)-3'     | 5'-AAATGGTGGTTTCCTTAAAATCAATTTC-3'      |
| <b>Other Genes</b>          |                                      |                                         |
| <i>TXK</i>                  | 5'-GGCCGCCCTACATTTGC(C/G)-3'         | 5'-TGGGTGGCATTCTGTTTCC-3'               |

<sup>(a)</sup>: Allele-specific primers appear with the alternative allele-specific nucleotide at the 3' end in parentheses

Supplementary Table 3. Genes tested from the Otago/Geneimprint Databases

| Not-Expressed in Placenta |         |                  | Readout SNP with MAF < 20% <sup>(a)</sup> |         |                  | Not-Imprinted in Placenta |         |                  | Enrolled     |         |                  |
|---------------------------|---------|------------------|-------------------------------------------|---------|------------------|---------------------------|---------|------------------|--------------|---------|------------------|
| Gene                      | NCBI ID | Expressed Allele | Gene                                      | NCBI ID | Expressed Allele | Gene                      | NCBI ID | Expressed Allele | Gene         | NCBI ID | Expressed Allele |
| <i>CPA4</i>               | 51200   | M                | <i>INS</i>                                | 3630    | P                | <i>OSBPL5</i>             | 114879  | M                | <i>IGF2</i>  | 3481    | P                |
| <i>IGF2AS</i>             | 51214   | P                | <i>ASCL2</i>                              | 430     | P                | <i>ATP10A</i>             | 57194   | M                | <i>PEG1</i>  | 4232    | P                |
| <i>KCNQ1OT1</i>           | 10984   | P                | <i>PHLDA2</i>                             | 7262    | M                | <i>GNAS1</i>              | 2778    | M                | <i>PEG3</i>  | 5178    | P                |
| <i>KCNQ1DN</i>            | 55539   | M                | <i>CDKN1C</i>                             | 1028    | M                | <i>PPP1R9A</i>            | 55607   | M                | <i>PEG10</i> | 23089   | P                |
| <i>SLC22A18</i>           | 5002    | M                |                                           |         |                  | <i>KCNQ1</i>              | 3784    | M                | <i>ZAC</i>   | 5325    | P                |
| <i>UBE3A</i>              | 7337    | M                |                                           |         |                  |                           |         |                  | <i>DLK1</i>  | 8788    | P                |
| <i>ZNF264</i>             | 9422    | M                |                                           |         |                  |                           |         |                  | <i>GTL2</i>  | 55384   | M                |
| <i>L3MBTL</i>             | 26013   | P                |                                           |         |                  |                           |         |                  | <i>H19</i>   | 283120  | M                |
|                           |         |                  |                                           |         |                  |                           |         |                  | <i>TP73</i>  | 7161    | M                |

<sup>(a)</sup>: MAF = Minimum Allele Frequency
